# Supplementary material
Source: MDPI journal article supplement (https://www.mdpi.com/1424-8247/16/2/200)
Supplement: s1 [file s1]

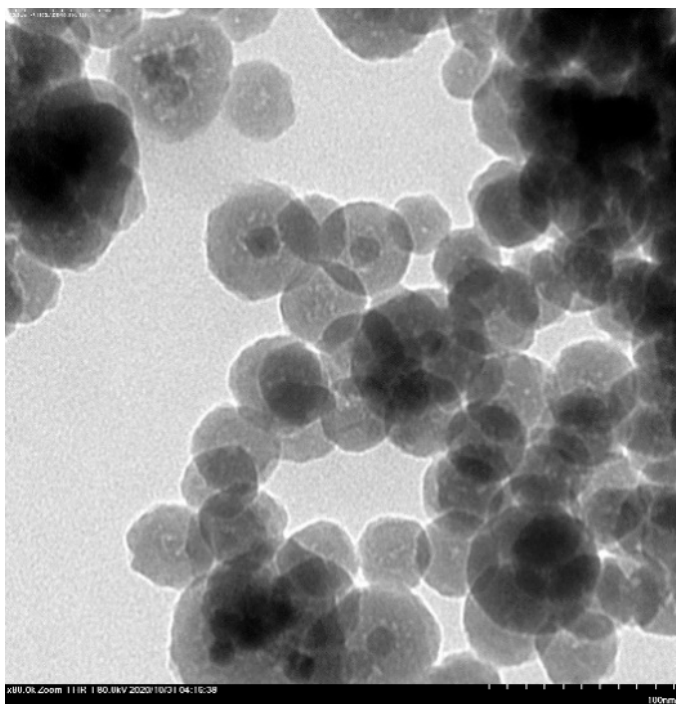

**Figure S1.** TEM image of MNPs.

**Table S1.** The Si:Fe:Ru molar ratios of MNPs calculated from ICP-OES (inductively coupled plasma optical emission spectrometry) data, diameter of MNPs ( $d_{\text{TEM}}$ ) evaluated from TEM, average size ( $d$ ), electrokinetic potential ( $\zeta$ ), polydispersity index (PDI) from DLS measurements in water.

| Sample | Molar ratio of<br>Si:Fe:Ru<br>(ICP-OES) | $C_{\text{NH}_2\text{-groups}}$ (mM)<br>per 1 g L <sup>-1</sup><br>dispersion | $d_{\text{TEM}}$ / nm | DLS data |       |              |
|--------|-----------------------------------------|-------------------------------------------------------------------------------|-----------------------|----------|-------|--------------|
|        |                                         |                                                                               |                       | $d$ /nm  | PDI   | $\zeta$ / mV |
|        | 1:0.07:0.011                            | 0.275                                                                         | 78±14                 | 900±100  | 0.882 | +14          |
